# Supplementary material for: Increased lipogenesis is critical for self‐renewal and growth of breast cancer stem cells: Impact of omega‐3 fatty acids
Source: PubMed Central journal article supplement — Stem Cells. 2021 Sep 17;39(12):1660–70. doi: 10.1002/stem.3452 (PMC9292025; doi:10.1002/stem.3452), 2021-09-17
Supplement: STEM-39-1660-s001.pdf [file STEM-39-1660-s001.pdf]

## Supplementary Information

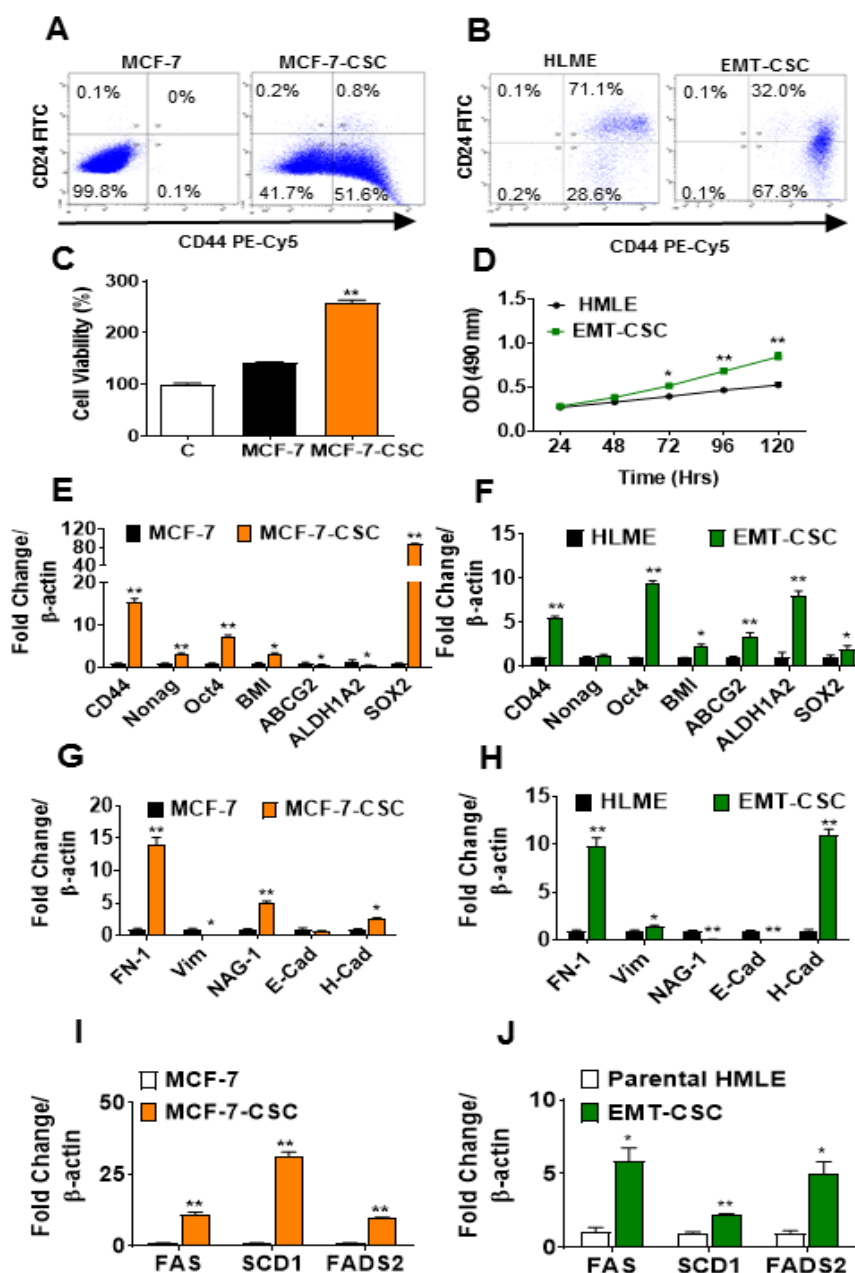

**Figure. S1 The characteristics of breast cancer stem cells.**

The breast CSC were identified by CD24<sup>low</sup> and CD44<sup>+</sup> using flow cytometry. The representative image of flow cytometry analysis in MCF-CSC (A) and EMT-CSC (B). (C) Comparison of cell viability between MCF-7 mammosphere cells (MCF-7-CSC) and MCF-7 cells after 72 h. The relative cell viability was based on the initial cell number of MCF-7 cells (100%). (D) Comparison of cell proliferation of parental HLME cells and EMT-CSC. mRNA expression of stem cell markers genes in MCF-7-CSC (E) and

EMT-CSC (F). mRNA expressions of EMT-related genes in MCF-7-CSC (G) and EMT-CSC (H). (I-J) Relative densitometric bar graphs of FAS, SCD1, and FADS2 analyzed from Fig. 1E&F.  $\beta$ -actin was used as a loading control. \*  $P < 0.05$ ; \*\*  $P < 0.01$  vs. their control cells.

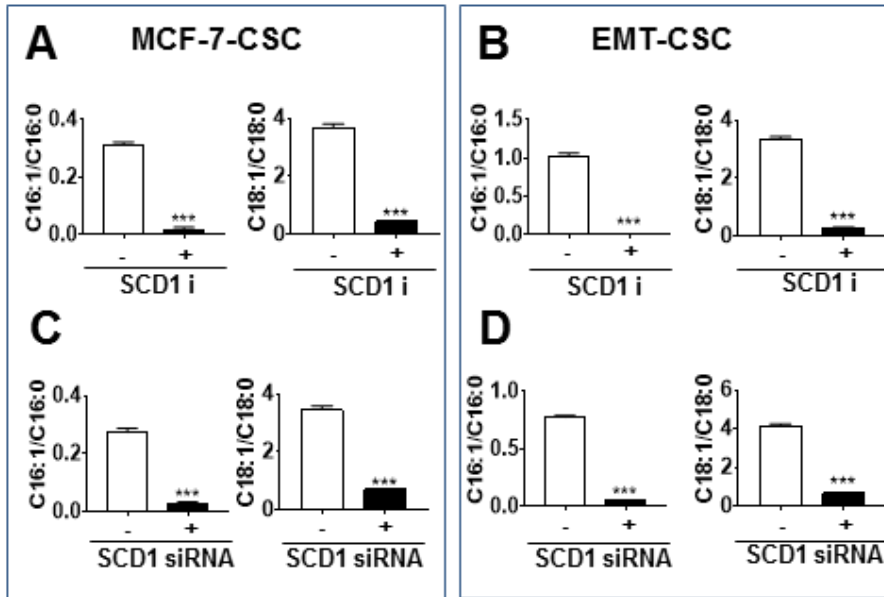

**Figure. S2 The distinct fatty acid profile before and after SCD1 inhibitor treatment or siRNA knockdown.**

Prior to measuring the fatty acid profiles of MCF-7-CSC and EMT-CSC, the cells were treated with SCD1 inhibitor for 48 h. The ratios of C16:1/C16:0 and C18:1/C18:0 in MCF-7-CSC were shown in (A). The ratios of C16:1/C16:0 and C18:1/C18:0 in EMT-CSC were shown in (B). After successful knockdown in SCD1, the fatty acid profiles were measured using GC. The changes of C16:1/C16:0 and C18:1/C18:0 in MCF-7-CSC were shown in (C). The changes of C16:1/C16:0 and C18:1/C18:0 in EMT-CSC were shown in (D).

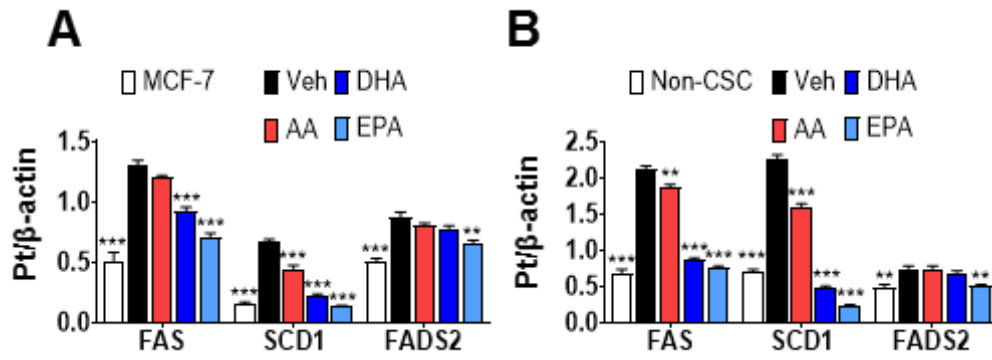

**Figure. S3** n-3 PUFA suppress the growth of breast cancer stem cells by blocking lipid metabolism *in vitro*.

Representative Western blot for protein expressions were shown in Fig. 4E&F. Relative densitometric bar graphs of FAS, SCD1, and FADS2 were plotted in (A-B).  $\beta$ -actin was used as a loading control. \*\*  $P < 0.01$ ; \*\*\*  $P < 0.001$  vs. their parental cells.

**Table. S1 Comparison of the fatty acid profile (%) of CSC and non-CSC**

|           | HMLE       |              | MCF-7      |              |
|-----------|------------|--------------|------------|--------------|
|           | Parental   | EMT-CSC      | MCF-7      | MCF-7-CSC    |
| C10:0     | 0.1±0.05   | 0.11±0.06    | 1.33±0.15  | 1.63±0.34    |
| C12:0     | 3.54±0.32  | 3.56±0.02    | 5.74±0.21  | 5.67±0.24    |
| C16:0     | 21.83±0.61 | 18.79±0.62*  | 34.02±0.17 | 30.07±1.53*  |
| C16:1     | 17.56±0.48 | 23.96±0.33** | 4.89±0.53  | 13.09±0.07** |
| C18:0     | 13.1±0.82  | 9.23±0.59*   | 21.48±0.58 | 15.13±1.06** |
| C18:1     | 35.72±0.7  | 38.06±0.86*  | 23.38±0.66 | 25.17±0.14** |
| C18:2 n-6 | 0.9±0.02   | 0.43±0.03**  | 8.72±0.38  | 1.95±0.37**  |
| C20:4 n-6 | 0.19±0.05  | 0.92±0.04**  | ND         | 3.92±0.42**  |
| C20:5 n-3 | ND         | ND           | ND         | ND           |
| C22:5 n-3 | ND         | ND           | ND         | 1.05±0.14**  |
| C22:6 n-3 | ND         | ND           | ND         | 0.95±0.14**  |
| SFA       | 42.82±1.34 | 37.27±0.57** | 63.01±1.16 | 52.79±2.05** |
| MUFA      | 56.09±1.32 | 61.7±0.56**  | 28.27±1.17 | 40.02±1.9**  |
| PUFA      | 1.09±0.05  | 1.03±0.03    | 8.72±0.38  | 7.2±1.04     |
| n-6 PUFA  | 1.09±0.05  | 1.03±0.03    | 8.72±0.38  | 5.87±0.17**  |
| n-3 PUFA  | ND         | ND           | ND         | 2±0.28**     |

The abbreviation was listed as follows, PUFA: Polyunsaturated fatty acid; MUFA: Monounsaturated fatty acid; SFA: Saturated fatty acid. C10:0: Capric acid; C12:0: Lauric acid; C16:0: Palmitic acid; C16:1: Hypogonic acid; C18:0: Stearic acid; C18:1: Oleic acid; C18:2 n-6: Linoleic acid; C20:4 n-6: Arachidonic acid; C20:5 n-3: Eicosapentaenoic acid; C22:5 n-3: Docosapentaenoic acid; C22:6 n-3: Docosahexaenoic acid. SFA: Saturated fatty acids;

MUFA: Monounsaturated fatty acids; PUFA: Polyunsaturated fatty acids; ND: not detectable; CSC vs Non-CSC or control, \* $P < 0.05$ ; \*\* $P < 0.01$ .

**Table. S2 Comparison of MUFA in CSC treated SCD1 inhibitor or siRNA**

|       | EMT-CSC    |              |            |              | MCF-7-CSC  |              |           |              |
|-------|------------|--------------|------------|--------------|------------|--------------|-----------|--------------|
|       | siRNA      | SCD1         | Inhibitor  | SCD1         | siRNA      | SCD1         | Inhibitor | SCD1         |
|       | control    | siRNA        | control    | inhibitor    | control    | siRNA        | control   | inhibitor    |
| C16:0 | 20.44±0.38 | 34.33±0.76   | 21.7±0.57  | 39.92±0.27   | 28.27±1.05 | 37.94±0.65   | 28.5±0.57 | 42.38±0.71   |
| C16:1 | 15.95±0.25 | 1.84±0.12    | 22.46±0.41 | ND           | 7.82±0.39  | 1.1±0.41     | 8.91±0.64 | 1.05±0.22    |
| C18:0 | 10.55±0.16 | 31.14±0.36** | 10.48±0.22 | 34.82±0.47** | 11.92±0.69 | 28.23±0.45** | 11.4±0.41 | 27.61±0.63** |
| C18:1 | 44.15±0.44 | 21.47±0.45** | 35.2±0.42  | 10.45±0.18** | 41.09±0.17 | 20.29±0.37** | 41.65±1.5 | 12.83±0.23** |

SCD1: Stearoyl-CoA desaturase 1; SCD1 siRNA or SCD1 inhibitor vs control, \*\* $P < 0.01$ .

**Table. S3 Comparison of fatty acid profiles (%) with different PUFA treatments in****MCF-CSC**

| Fatty Acids <sup>#</sup> | MCF-7-CSC  | AA                       | EPA                       | DHA                       |
|--------------------------|------------|--------------------------|---------------------------|---------------------------|
| C10:0                    | 1.66±0.37  | 1.49±0.40                | 1.26±0.38                 | 0.91±0.12                 |
| C12:0                    | 5.49±0.44  | 5.06±0.43                | 4.44±0.46                 | 4.29±0.36 <sup>†</sup>    |
| C16:0                    | 30.43±1.34 | 28.57±0.06               | 33.00±1.44                | 30.63±1.03                |
| C16:1                    | 13.13±0.33 | 12.27±0.21               | 10.00±0.75 <sup>†</sup>   | 11.30±0.44 <sup>†</sup>   |
| C18:0                    | 15.31±0.12 | 22.93±0.51 <sup>**</sup> | 31.67±1.22 <sup>**</sup>  | 28.17±0.55 <sup>***</sup> |
| C18:1                    | 24.98±0.40 | 20.27±0.57 <sup>**</sup> | 13.33±1.15 <sup>**</sup>  | 15.67±0.40 <sup>***</sup> |
| C18:2 n-6                | 2.02±0.15  | 0.96±0.08 <sup>**</sup>  | 0.81±0.05 <sup>**</sup>   | 1.61±0.24                 |
| C18:3 n-3                | ND         | ND                       | ND                        | ND                        |
| C20:4 n-6                | 4.13±0.13  | 5.1±0.20 <sup>**</sup>   | 2.06±0.13 <sup>***</sup>  | 2.62±0.15 <sup>***</sup>  |
| C20:5 n-3                | ND         | ND                       | 0.65±0.10 <sup>***</sup>  | ND                        |
| C22:5 n-3                | 0.55±0.07  | 0.58±0.07                | 0.63±0.07                 | 0.94±0.06 <sup>***</sup>  |
| C22:6 n-3                | 0.54±0.08  | 0.43±0.05                | 0.76±0.10                 | 1.53±0.17 <sup>**</sup>   |
| SFA                      | 53.18±1.09 | 58.97±0.33 <sup>†</sup>  | 71.76±0.33 <sup>***</sup> | 66.37±0.63 <sup>***</sup> |
| MUFA                     | 39.58±1.35 | 33.78±0.17 <sup>†</sup>  | 23.33±0.4 <sup>†</sup>    | 26.97±0.78 <sup>**</sup>  |
| PUFA                     | 7.24±0.27  | 7.07±0.18                | 4.91±0.11 <sup>**</sup>   | 6.70±0.22                 |
| C16:1/C16:0              | 0.43±0.02  | 0.43±0.01                | 0.30±0.02 <sup>**</sup>   | 0.37±0.02 <sup>†</sup>    |
| C18:1/C18:0              | 1.63±0.03  | 0.88±0.01 <sup>***</sup> | 0.42±0.03 <sup>***</sup>  | 0.56±0.01 <sup>**</sup>   |
| n-6 PUFA                 | 6.15±0.20  | 6.06±0.26                | 2.87±0.08 <sup>***</sup>  | 4.23±0.38 <sup>**</sup>   |
| n-3 PUFA                 | 1.09±0.13  | 1.01±0.08                | 2.04±0.19 <sup>**</sup>   | 2.47±0.23 <sup>***</sup>  |

n-6/n-3      5.70±0.69      6.06±0.74      1.41±0.18\*      1.73±0.30\*\*

\*  $P < 0.05$ ; \*\*  $P < 0.01$ ; \*\*\*  $P < 0.001$  vs. MCF-7-CSC.

**Table. S4 The basic information of 80 breast cancer patients for immunohistochemistry**

**analysis**

|                  |          | Cases (#) | Percentage (%) |
|------------------|----------|-----------|----------------|
| Histologic       | IDC      | 49        | 61.2           |
|                  | DSIC     | 2         | 2.5            |
|                  | IDC+DSIC | 21        | 26.2           |
|                  | DSIC+IDC | 3         | 3.7            |
|                  | ILC      | 1         | 1.2            |
|                  | IMC      | 2         | 2.5            |
|                  | MA       | 2         | 2.5            |
| Age              | <60      | 29        | 36.3           |
|                  | ≥60      | 51        | 63.7           |
| Grade            | G1       | 5         | 6.2            |
|                  | G2       | 33        | 41.3           |
|                  | G3       | 38        | 47.5           |
|                  | N/A      | 4         | 5.0            |
| Stage            | I        | 4         | 5.0            |
|                  | II       | 34        | 42.5           |
|                  | III      | 32        | 40.0           |
|                  | N/A      | 10        | 12.5           |
| T classification | T1       | 36        | 45.0           |



---

|                  |    |    |      |
|------------------|----|----|------|
|                  | T2 | 38 | 47.5 |
|                  | T3 | 5  | 6.3  |
|                  | T4 | 1  | 1.2  |
| N classification | N0 | 41 | 51.3 |
|                  | N1 | 25 | 31.2 |
|                  | N2 | 8  | 10.0 |
|                  | N3 | 6  | 7.5  |

---

IDC: infiltrating ductal carcinoma; DCIS: ductal carcinoma in situ; ILC: infiltrating lobular carcinoma; IMC: invasive micropapillary carcinoma; MA:

medullary/mucinous adenocarcinoma. N/A: not available.

**Table S5. Fatty acid profile in tumor tissues ( $\mu\text{g}/\text{mg}$  of tissue)**

| Fatty Acid <sup>1</sup> | Control         | n-3 PUFA        |
|-------------------------|-----------------|-----------------|
| C12:0                   | 0.19 $\pm$ 0.09 | 0.04 $\pm$ 0.03 |
| C14:1                   | 0.03 $\pm$ 0.02 | 0.02 $\pm$ 0.01 |
| C16:0                   | 2.20 $\pm$ 0.98 | 1.75 $\pm$ 0.43 |
| C16:1                   | 0.41 $\pm$ 0.21 | 0.23 $\pm$ 0.05 |
| C17:0                   | 0.22 $\pm$ 0.06 | 0.48 $\pm$ 0.13 |
| C17:1                   | 0.02 $\pm$ 0.02 | 0.01 $\pm$ 0.01 |
| C18:0                   | 1.36 $\pm$ 0.56 | 1.25 $\pm$ 0.33 |
| C18:1                   | 1.88 $\pm$ 1.02 | 1.04 $\pm$ 0.23 |
| C18:2                   | 1.90 $\pm$ 1.04 | 1.19 $\pm$ 0.28 |
| C18:3                   | 0.03 $\pm$ 0.02 | 0.01 $\pm$ 0.01 |
| C20:0                   | 0.06 $\pm$ 0.02 | 0.05 $\pm$ 0.01 |
| C20:1                   | 0.06 $\pm$ 0.03 | 0.02 $\pm$ 0.01 |
| C20:2                   | 0.07 $\pm$ 0.03 | 0.03 $\pm$ 0.01 |
| C20:3                   | 0.06 $\pm$ 0.02 | 0.03 $\pm$ 0.01 |
| C20:4                   | 0.60 $\pm$ 0.26 | 0.41 $\pm$ 0.17 |
| C20:5                   | 0.01 $\pm$ 0.01 | 0.05 $\pm$ 0.03 |
| C22:0                   | 0.08 $\pm$ 0.02 | 0.06 $\pm$ 0.01 |
| C22:1                   | 0.02 $\pm$ 0.02 | ND              |
| C22:4                   | 0.03 $\pm$ 0.03 | ND              |

|          |            |           |
|----------|------------|-----------|
| C22:5    | ND         | 0.04±0.04 |
| C22:6    | 0.05±0.04  | 0.14±0.06 |
| SFA      | 4.10±1.71  | 3.63±0.89 |
| MUFA     | 2.42±1.31  | 1.32±0.28 |
| PUFA     | 2.76±1.40  | 1.90±0.49 |
| n-3 PUFA | 0.09±0.04  | 0.24±0.10 |
| n-6 PUFA | 2.60±1.35  | 1.63±0.41 |
| n-6/n-3  | 46.95±4.63 | 8.2 ±1.87 |

<sup>1</sup> The abbreviation was listed as follows, C14:1 n-7: Myristoleate; C17:0: Heptadecanoate; C17:1: 10-Heptadecenoate; C20:0: Arachidate; C20:1: 11-Eicosenoate; C20:2: 11, 14-Eicosadienoate; C20:3 n-6: 11, 14, 17-Eicosatrienoate; C22:0: Behenate; C22:1: Erucate; C22:4 n-6: Docosatetraenoate. Others have been mentioned in Table S1.

**Table S6. Primer sequences of gene used for real-time PCR**

| Gene              | Forward (5'-3')       | Reverse (5'-3')        |
|-------------------|-----------------------|------------------------|
| <i>Nanog</i>      | GAGACGGGGTTTCACTGTGT  | CCTCCCAATCCCAAACAATA   |
| <i>COX2</i>       | GGATCTGTGGATGCTTCGTT  | CCCAGGTTTTGTCAGCAGAT   |
| <i>Oct4</i>       | AGTGAGAGGCAACCTGGAGA  | CAAAAACCCTGGCACAACCT   |
| <i>Sox2</i>       | AGTCTCCAAGCGACGAAAAA  | GGAAAGTTGGGATCGAACAA   |
| <i>BMI</i>        | GTCCCCAGTCTGCAAAGAA   | AATGGGCTTTCAAGCAATTTT  |
| <i>ABCG2</i>      | GCCCTGACACTGGTCATCTT  | GGGACAGGTATGTGAAAAGCA  |
| <i>ALDH1A2</i>    | TGAATTGCTATGGCGTGGTA  | ACTTGGGGGTCACATTTTCTAG |
| <i>NAG-1</i>      | CAGTCGGACCAACTGCTGGCA | TGAGCACCATGGGATTGTAGC  |
| <i>VIM</i>        | CCCTCACCTGTGAAGTGGAT  | TCCAGCAGCTTCCTGTAGGT   |
| <i>CD44</i>       | GCCTGGTAGAATTGGCTTTTC | AGAGGAAGGGTGTGCTCTGA   |
| <i>FN-1</i>       | GCCCGCAATACTGTAGGAAC  | AATTATTTCCCCCGAAGGTG   |
| <i>E-cadherin</i> | TGCCCAGAAAATGAAAAAGG  | GTGTATGTGGCAATGCGTTC   |
| <i>N-cadherin</i> | ACAGTGGCCACCTACAAAAGG | CCGAGATGGGGTTGATAATG   |
| <i>FAS</i>        | CGCTTGGTCTTTCTGTGCTT  | TAAAATGAAACGGGGTCCA    |
| <i>SCD1</i>       | GTGCCACTGACTTGCTGTGT  | TGGCAATGCGTTGTTTATGT   |
| <i>D6D</i>        | CAGGGTGGAGCTGAGAAGAG  | AAAATGTAGGGGTGGGGAAG   |
| <i>GAPDH</i>      | GTCAGTGGTGGACCTGACCT  | AGGGGTCTACATGGCAACTG   |

Nanog: Nanog homeobox; Sox2: Sex-determining region Y-box2; Oct4: Octamer-binding protein; BMI: B lymphoma Mo-MLV insertion region 1

homolog; ABCG2: ATP-binding cassette sub-family G member 2; ALDH1A2: Aldehyde dehydrogenase 1 family; member A2, NAG-1:

Anti-inflammatory drug activated gene-1; VIM: Vimentin; FN-1: Fibronectin 1; FAS: Fatty acid synthase; SCD-1: Stearoyl-CoA desaturase enzyme 1;

D6D: Delta 6-Desaturase; GAPDH: Glyceraldehyde-3-phosphate dehydrogenase
